# Supplementary material
Source: Springer Nature journal article supplement (https://www.springermedizin.de/resource/supplementary/12889_2011_4375_MOESM1_ESM.pdf/9492242)
Supplement: MOESM1 [file 9492242]

## Supplementary material

CRC mortality RR estimation and 95% credible interval (95%CI) in near vs far analysis for industrial sectors for both sexes, men and woman and diferent threshold distances.

| Industrial sector                         | 2km                  | 3km                  | 4km                  | 5km                  |
|-------------------------------------------|----------------------|----------------------|----------------------|----------------------|
|                                           | RR<br>(95% CI)       | RR<br>(95% CI)       | RR<br>(95% CI)       | RR<br>(95% CI)       |
| 1 Combustion installations                | 1.028<br>0.962 1.099 | 1.036<br>0.982 1.093 | 1.059<br>1.011 1.109 | 1.066<br>1.020 1.114 |
| Men                                       | 1.001<br>0.922 1.087 | 1.029<br>0.967 1.095 | 1.056<br>1.000 1.116 | 1.062<br>1.007 1.120 |
| Women                                     | 1.076<br>0.986 1.174 | 1.039<br>0.972 1.110 | 1.049<br>0.991 1.110 | 1.053<br>0.997 1.112 |
| 2 Refineries and coke ovens               | 0.994<br>0.826 1.196 | 1.042<br>0.879 1.235 | 1.045<br>0.903 1.210 | 1.056<br>0.936 1.191 |
| Men                                       | 0.999<br>0.806 1.238 | 1.080<br>0.896 1.302 | 1.064<br>0.894 1.265 | 1.043<br>0.905 1.202 |
| Women                                     | 1.072<br>0.877 1.310 | 1.104<br>0.912 1.336 | 1.018<br>0.855 1.212 | 1.059<br>0.919 1.220 |
| 3 Metallurgical                           | 1.065<br>1.011 1.123 | 1.057<br>1.008 1.107 | 1.064<br>1.017 1.113 | 1.073<br>1.029 1.120 |
| Men                                       | 1.059<br>0.995 1.128 | 1.023<br>0.970 1.080 | 1.068<br>1.012 1.126 | 1.080<br>1.027 1.135 |
| Women                                     | 1.033<br>0.968 1.102 | 1.018<br>0.961 1.078 | 1.037<br>0.981 1.095 | 1.042<br>0.990 1.097 |
| 4 Galvanization                           | 1.037<br>0.958 1.123 | 1.055<br>0.984 1.130 | 1.044<br>0.980 1.112 | 1.040<br>0.982 1.102 |
| Men                                       | 1.048<br>0.952 1.153 | 1.032<br>0.954 1.116 | 1.055<br>0.979 1.137 | 1.040<br>0.971 1.114 |
| Women                                     | 0.993<br>0.896 1.099 | 1.011<br>0.928 1.101 | 1.015<br>0.939 1.097 | 1.030<br>0.959 1.106 |
| 5 Surface treatment of metals and plastic | 1.037<br>0.997 1.079 | 1.054<br>1.017 1.092 | 1.063<br>1.026 1.101 | 1.062<br>1.026 1.100 |
| Men                                       | 1.049<br>1.000 1.100 | 1.022<br>0.980 1.065 | 1.067<br>1.022 1.113 | 1.063<br>1.019 1.109 |
| Women                                     | 0.984<br>0.938 1.034 | 1.011<br>0.968 1.056 | 1.039<br>0.995 1.085 | 1.042<br>0.999 1.088 |
| 6 Mining industry                         | 1.258<br>1.082 1.463 | 1.230<br>1.065 1.420 | 1.226<br>1.078 1.395 | 1.249<br>1.103 1.414 |
| Men                                       | 1.260<br>1.051 1.511 | 1.212<br>1.026 1.432 | 1.269<br>1.088 1.479 | 1.260<br>1.086 1.462 |
| Women                                     | 1.180<br>0.976 1.428 | 1.160<br>0.964 1.395 | 1.127<br>0.956 1.328 | 1.175<br>1.003 1.377 |
| 7 Cement and lime                         | 0.977<br>0.884 1.080 | 1.025<br>0.944 1.114 | 1.051<br>0.985 1.122 | 1.055<br>0.995 1.118 |
| Men                                       | 0.928<br>0.818 1.053 | 0.949<br>0.857 1.051 | 0.991<br>0.915 1.075 | 1.009<br>0.940 1.083 |
| Women                                     | 1.049<br>0.921 1.194 | 1.099<br>0.987 1.223 | 1.137<br>1.048 1.233 | 1.115<br>1.037 1.199 |
| 8 Glass and mineral fibres                | 1.077<br>0.977 1.187 | 1.047<br>0.976 1.124 | 1.063<br>0.995 1.136 | 1.075<br>1.011 1.142 |

|                                |       |                      |                      |                      |                      |
|--------------------------------|-------|----------------------|----------------------|----------------------|----------------------|
|                                | Men   | 1.105<br>0.982 1.243 | 1.036<br>0.956 1.122 | 1.036<br>0.957 1.122 | 1.050<br>0.977 1.128 |
|                                | Women | 1.031<br>0.907 1.172 | 1.017<br>0.933 1.108 | 1.090<br>1.006 1.182 | 1.092<br>1.016 1.174 |
| 9 Ceramic                      |       | 1.050<br>1.004 1.099 | 1.056<br>1.014 1.100 | 1.049<br>1.009 1.091 | 1.050<br>1.012 1.089 |
|                                | Men   | 1.012<br>0.956 1.071 | 1.004<br>0.956 1.055 | 1.018<br>0.969 1.069 | 1.033<br>0.987 1.082 |
|                                | Women | 1.085<br>1.024 1.150 | 1.076<br>1.021 1.134 | 1.086<br>1.032 1.142 | 1.068<br>1.020 1.120 |
| 10 Organic chemical industry   |       | 1.011<br>0.958 1.067 | 1.033<br>0.987 1.082 | 1.038<br>0.994 1.083 | 1.053<br>1.010 1.098 |
|                                | Men   | 1.015<br>0.951 1.083 | 1.019<br>0.966 1.074 | 1.054<br>1.001 1.110 | 1.066<br>1.013 1.121 |
|                                | Women | 0.979<br>0.915 1.049 | 0.989<br>0.935 1.047 | 1.009<br>0.957 1.064 | 1.022<br>0.971 1.076 |
| 11 Inorganic chemical industry |       | 0.962<br>0.882 1.049 | 1.013<br>0.954 1.077 | 1.027<br>0.971 1.085 | 1.041<br>0.989 1.096 |
|                                | Men   | 0.911<br>0.820 1.013 | 0.979<br>0.913 1.050 | 1.029<br>0.963 1.100 | 1.046<br>0.983 1.113 |
|                                | Women | 1.011<br>0.907 1.127 | 0.994<br>0.922 1.073 | 1.013<br>0.945 1.086 | 1.021<br>0.958 1.089 |
| 12 Fertilisers                 |       | 1.073<br>0.978 1.178 | 1.053<br>0.965 1.149 | 1.052<br>0.969 1.142 | 1.049<br>0.971 1.133 |
|                                | Men   | 1.098<br>0.983 1.227 | 1.075<br>0.975 1.186 | 1.101<br>0.999 1.214 | 1.075<br>0.980 1.179 |
|                                | Women | 1.022<br>0.916 1.140 | 0.993<br>0.896 1.101 | 0.988<br>0.894 1.091 | 1.014<br>0.923 1.113 |
| 13 Biocides                    |       | 1.125<br>0.977 1.295 | 1.048<br>0.934 1.175 | 1.088<br>0.976 1.212 | 1.064<br>0.959 1.181 |
|                                | Men   | 1.117<br>0.937 1.331 | 1.001<br>0.873 1.148 | 1.084<br>0.949 1.240 | 1.066<br>0.937 1.212 |
|                                | Women | 1.077<br>0.891 1.302 | 1.016<br>0.872 1.182 | 1.052<br>0.910 1.216 | 1.029<br>0.895 1.184 |
| 14 Pharmaceutical products     |       | 1.052<br>0.978 1.131 | 1.041<br>0.983 1.103 | 1.048<br>0.990 1.110 | 1.077<br>1.019 1.138 |
|                                | Men   | 1.037<br>0.950 1.132 | 1.014<br>0.950 1.083 | 1.048<br>0.979 1.122 | 1.079<br>1.010 1.152 |
|                                | Women | 1.039<br>0.952 1.134 | 1.010<br>0.943 1.081 | 1.036<br>0.968 1.109 | 1.052<br>0.985 1.123 |
| 15 Explosives and pyrotechnics |       | 0.983<br>0.895 1.080 | 1.027<br>0.951 1.109 | 1.028<br>0.957 1.104 | 1.017<br>0.949 1.089 |
|                                | Men   | 0.990<br>0.881 1.113 | 1.011<br>0.923 1.108 | 1.009<br>0.924 1.102 | 0.995<br>0.914 1.083 |
|                                | Women | 0.984<br>0.870 1.112 | 1.035<br>0.938 1.141 | 1.049<br>0.958 1.149 | 1.042<br>0.955 1.138 |
| 16 Hazardous waste             |       | 1.014<br>0.935 1.100 | 1.062<br>1.002 1.125 | 1.060<br>1.007 1.116 | 1.073<br>1.023 1.126 |
|                                | Men   | 1.010<br>0.914 1.117 | 1.042<br>0.975 1.113 | 1.086<br>1.021 1.155 | 1.102<br>1.041 1.166 |

|                                             |       |                      |                      |                      |                      |
|---------------------------------------------|-------|----------------------|----------------------|----------------------|----------------------|
|                                             | Women | 1.017<br>0.917 1.128 | 1.032<br>0.962 1.106 | 1.018<br>0.955 1.085 | 1.027<br>0.969 1.090 |
| 17 Non-hazardous waste                      |       | 1.000<br>0.898 1.115 | 1.073<br>1.003 1.148 | 1.107<br>1.044 1.175 | 1.121<br>1.066 1.179 |
|                                             | Men   | 1.011<br>0.888 1.152 | 1.072<br>0.994 1.157 | 1.156<br>1.078 1.239 | 1.157<br>1.090 1.228 |
|                                             | Women | 0.963<br>0.839 1.105 | 1.005<br>0.926 1.092 | 1.030<br>0.956 1.110 | 1.056<br>0.991 1.124 |
| 18 Disposal or recycling of animal waste    |       | 1.019<br>0.903 1.150 | 1.038<br>0.948 1.137 | 1.013<br>0.942 1.089 | 1.029<br>0.963 1.099 |
|                                             | Men   | 0.971<br>0.833 1.132 | 1.005<br>0.904 1.117 | 0.998<br>0.913 1.091 | 1.027<br>0.947 1.113 |
|                                             | Women | 1.069<br>0.910 1.255 | 1.032<br>0.924 1.154 | 1.034<br>0.946 1.132 | 1.035<br>0.953 1.124 |
| 19 Urban waste-water treatment plants       |       | 1.055<br>0.986 1.129 | 1.038<br>0.987 1.093 | 1.047<br>1.000 1.095 | 1.051<br>1.007 1.096 |
|                                             | Men   | 1.006<br>0.926 1.093 | 0.994<br>0.937 1.055 | 1.030<br>0.975 1.089 | 1.036<br>0.984 1.091 |
|                                             | Women | 1.080<br>0.995 1.172 | 1.026<br>0.965 1.091 | 1.054<br>0.998 1.113 | 1.054<br>1.001 1.110 |
| 20 Paper and wood production                |       | 1.071<br>1.007 1.140 | 1.078<br>1.023 1.137 | 1.065<br>1.016 1.118 | 1.066<br>1.019 1.114 |
|                                             | Men   | 1.088<br>1.010 1.173 | 1.062<br>0.998 1.129 | 1.066<br>1.006 1.130 | 1.075<br>1.019 1.134 |
|                                             | Women | 1.031<br>0.953 1.115 | 1.037<br>0.970 1.109 | 1.062<br>1.000 1.128 | 1.049<br>0.993 1.109 |
| 21 Pre-treatment or dyeing of textiles      |       | 1.015<br>0.914 1.128 | 1.007<br>0.908 1.117 | 1.029<br>0.933 1.136 | 1.010<br>0.921 1.106 |
|                                             | Men   | 1.019<br>0.893 1.164 | 0.987<br>0.869 1.121 | 1.019<br>0.900 1.154 | 1.006<br>0.897 1.128 |
|                                             | Women | 0.987<br>0.857 1.136 | 0.988<br>0.861 1.135 | 1.028<br>0.901 1.172 | 1.000<br>0.885 1.130 |
| 23 Food and beverage sector                 |       | 1.069<br>1.029 1.111 | 1.067<br>1.031 1.105 | 1.067<br>1.034 1.102 | 1.072<br>1.039 1.107 |
|                                             | Men   | 1.052<br>1.003 1.103 | 1.036<br>0.994 1.079 | 1.067<br>1.026 1.109 | 1.075<br>1.034 1.116 |
|                                             | Women | 1.070<br>1.018 1.124 | 1.053<br>1.008 1.100 | 1.059<br>1.018 1.103 | 1.062<br>1.021 1.104 |
| 26 Surface treatment using organic solvents |       | 1.055<br>0.989 1.126 | 1.066<br>1.013 1.121 | 1.072<br>1.024 1.123 | 1.072<br>1.027 1.120 |
|                                             | Men   | 1.077<br>0.995 1.164 | 1.042<br>0.983 1.104 | 1.081<br>1.023 1.142 | 1.084<br>1.028 1.142 |
|                                             | Women | 1.000<br>0.923 1.085 | 1.008<br>0.947 1.072 | 1.042<br>0.985 1.102 | 1.039<br>0.985 1.096 |
| 28 Ship building                            |       | 1.093<br>0.948 1.261 | 1.103<br>0.962 1.264 | 1.106<br>0.965 1.268 | 1.107<br>0.965 1.269 |
|                                             | Men   | 1.102<br>0.936 1.299 | 1.114<br>0.964 1.288 | 1.126<br>0.961 1.319 | 1.126<br>0.962 1.319 |
|                                             | Women | 1.072<br>0.932 1.233 | 1.075<br>0.938 1.232 | 1.076<br>0.934 1.240 | 1.077<br>0.934 1.240 |
